# Supplementary material for: Loss of c‐Jun N‐terminal Kinase 1 and 2 Function in Liver Epithelial Cells Triggers Biliary Hyperproliferation Resembling Cholangiocarcinoma
Source: PubMed Central journal article supplement — Hepatol Commun. 2020 Apr 16;4(6):834–51. doi: 10.1002/hep4.1495 (PMC7262317; doi:10.1002/hep4.1495), 2020-04-16
Supplement: HEP4-4-834-s016.pdf [file HEP4-4-834-s016.pdf]

**A**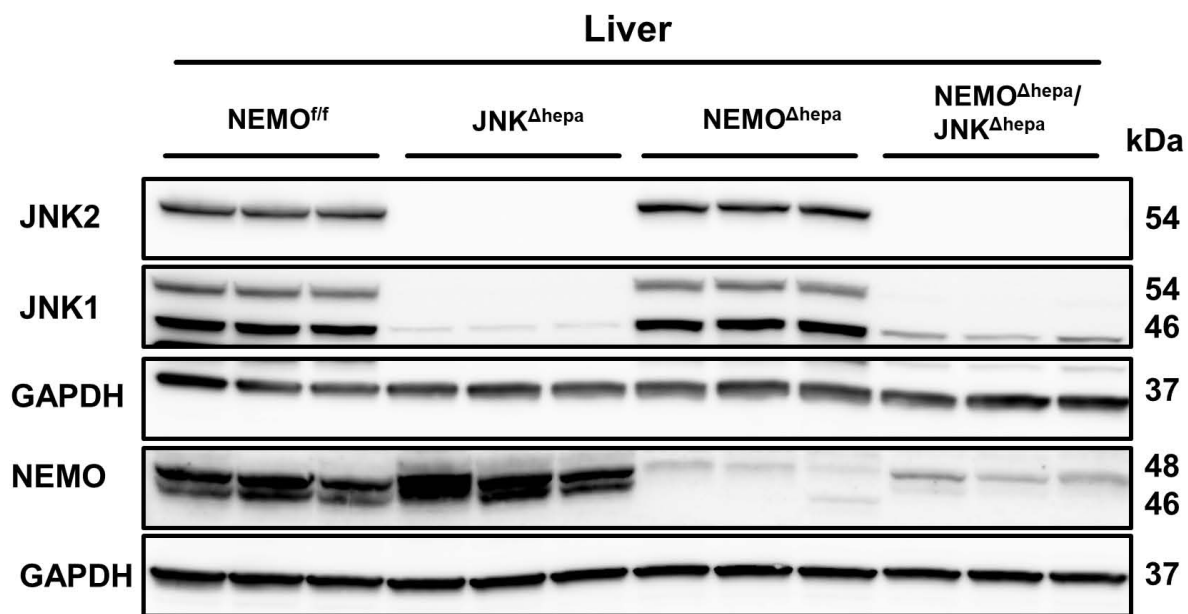**B**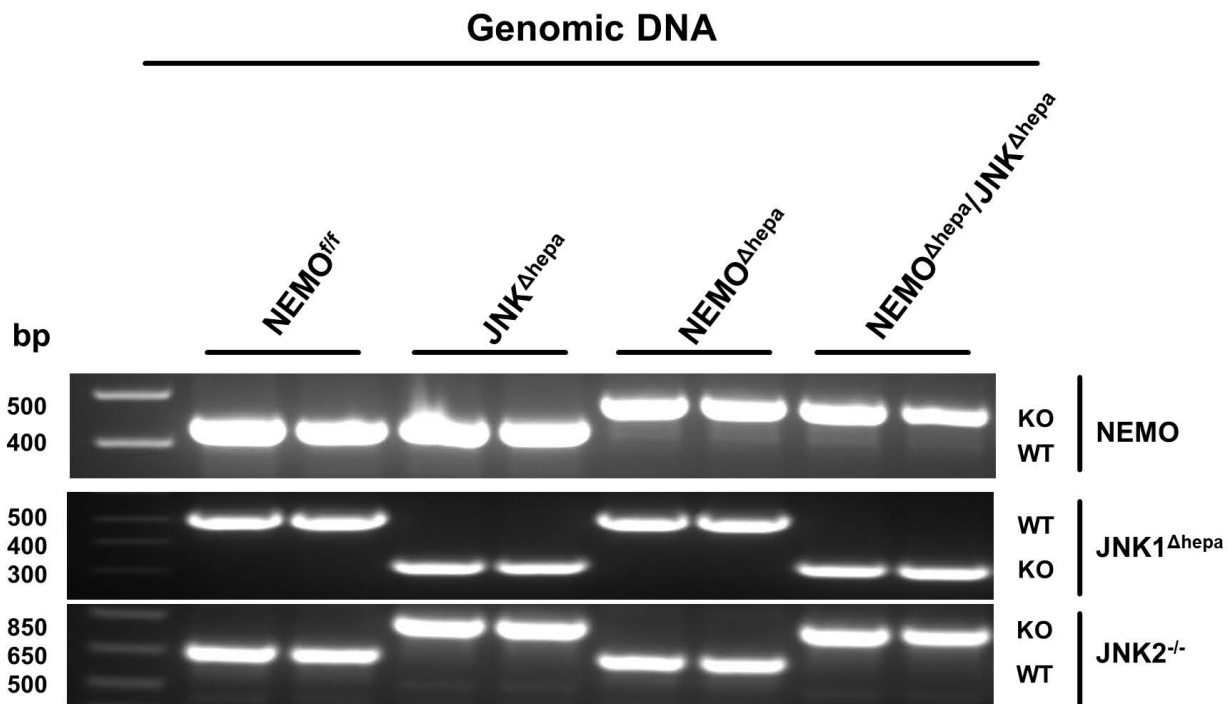

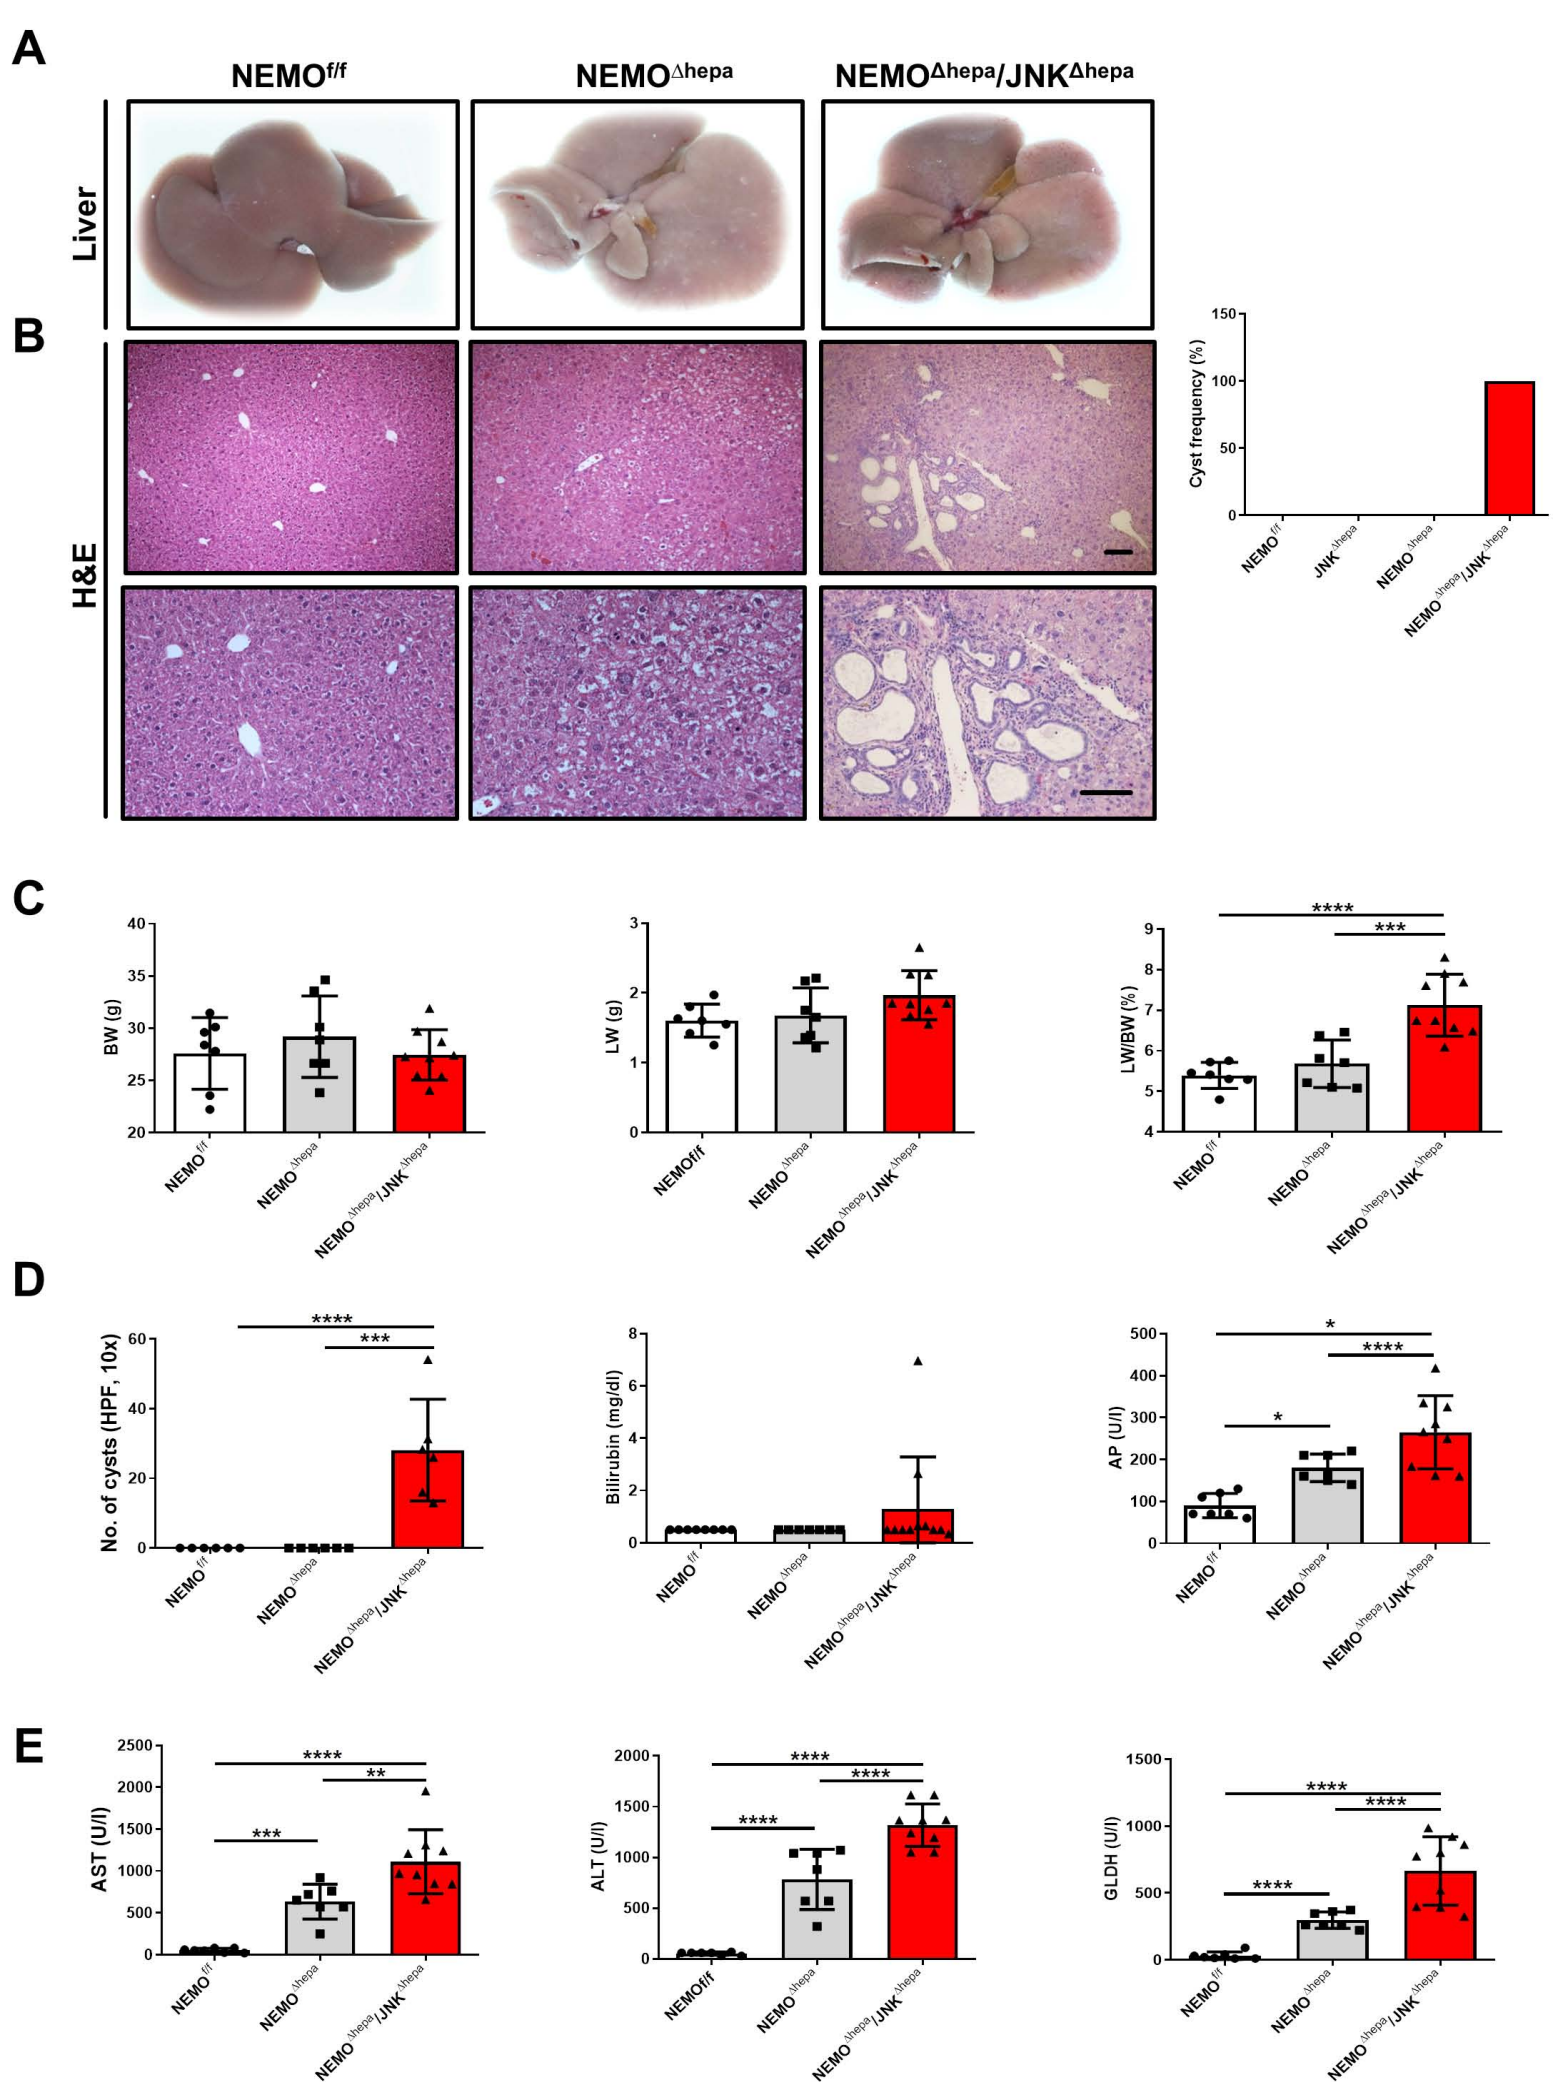

**Suppl. Fig. 2**

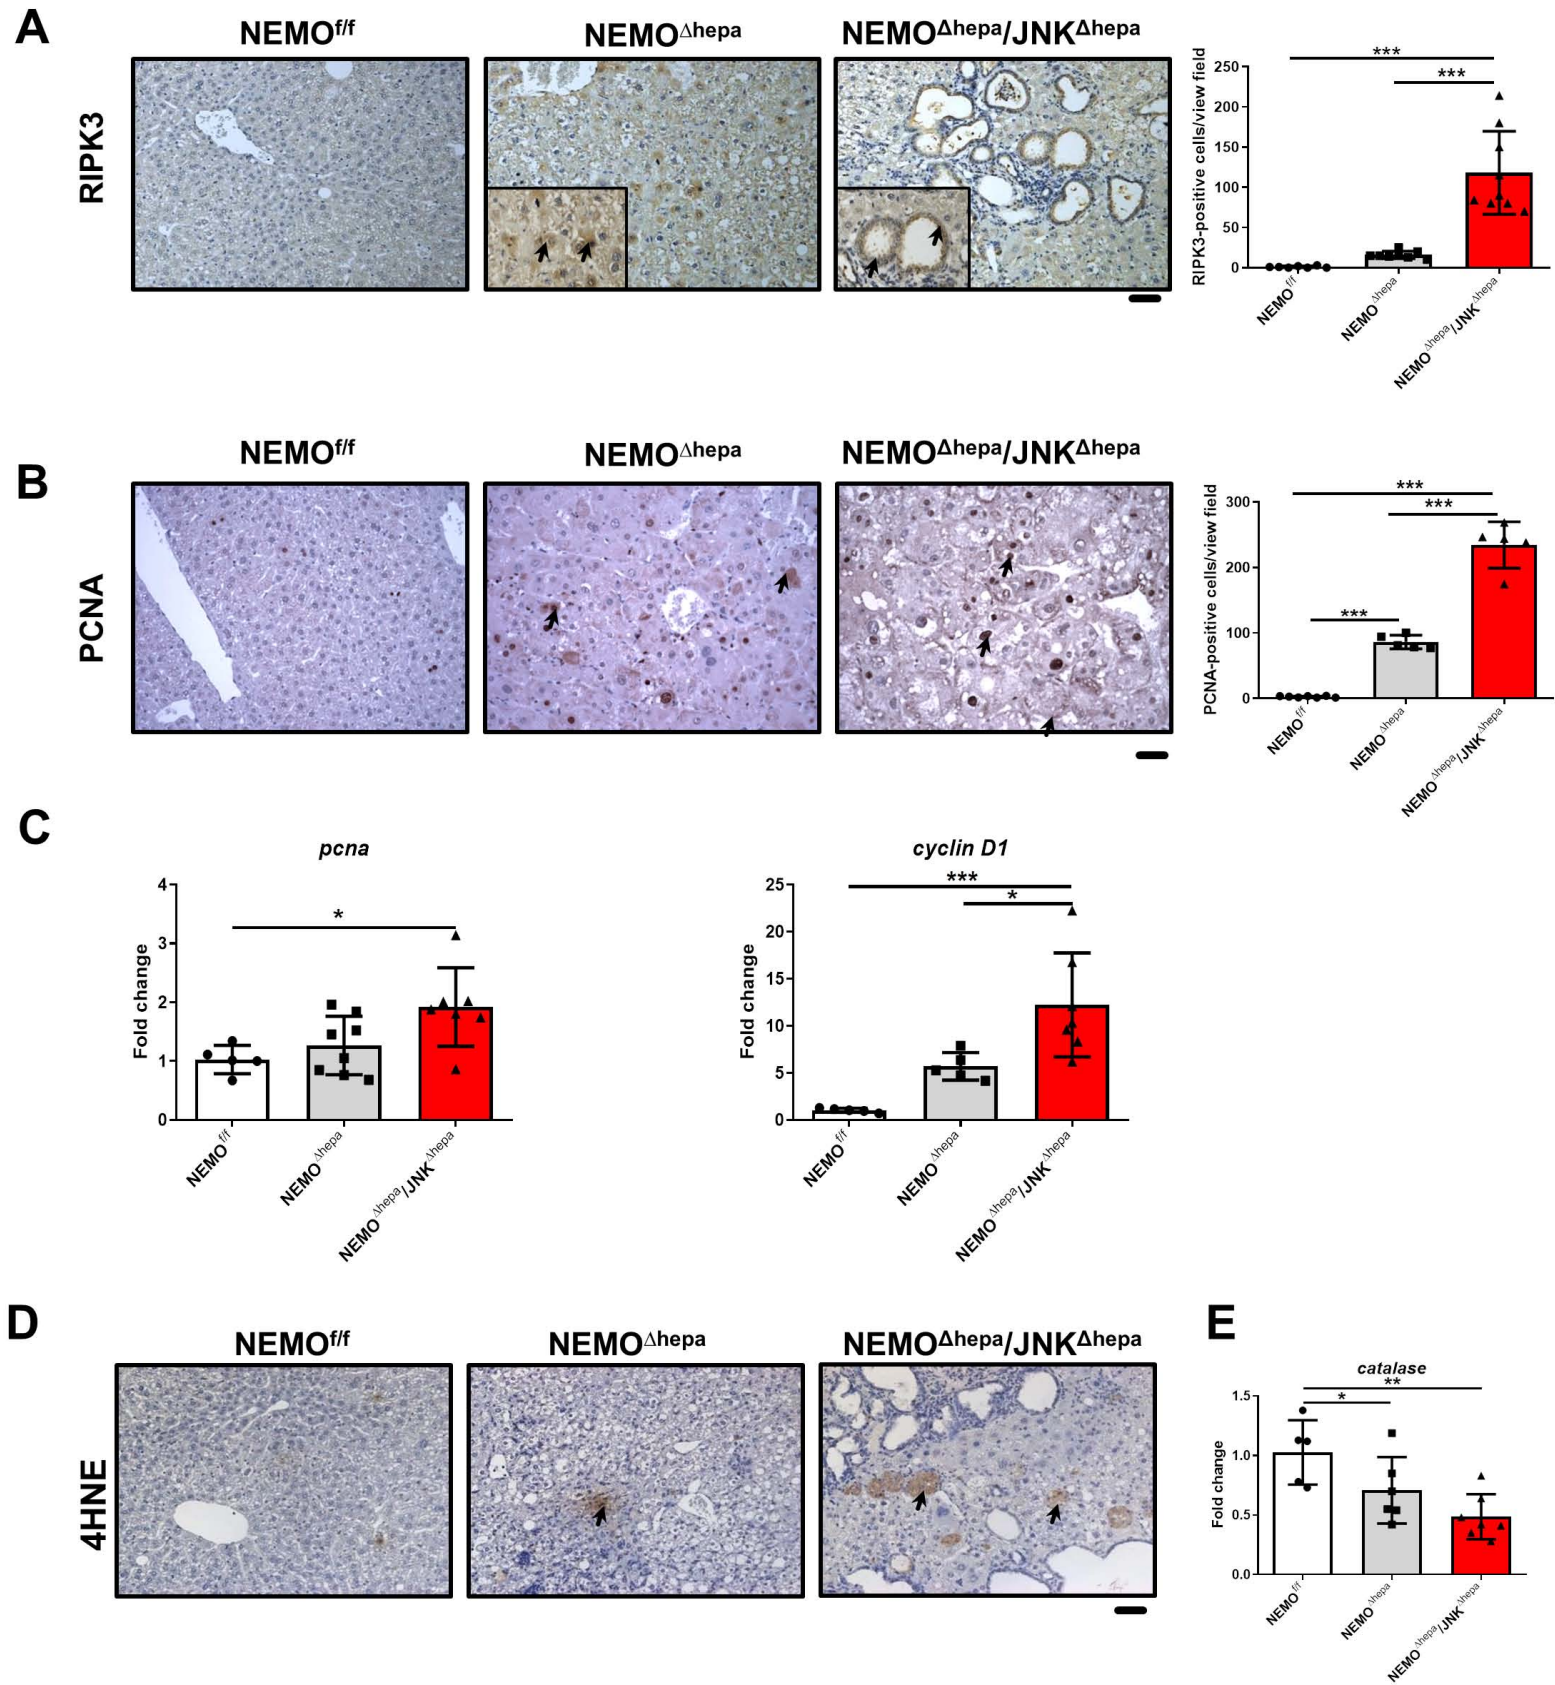

Suppl. Fig. 3

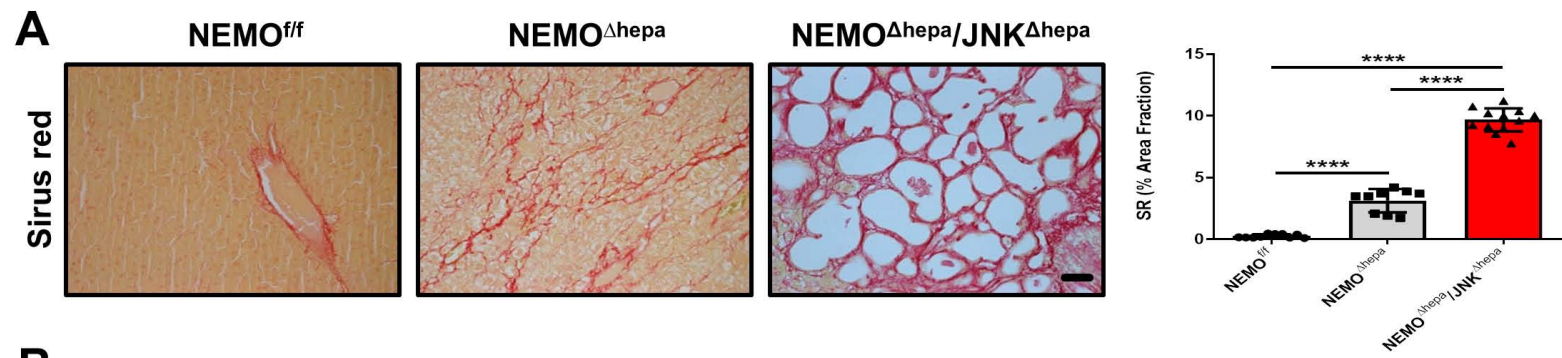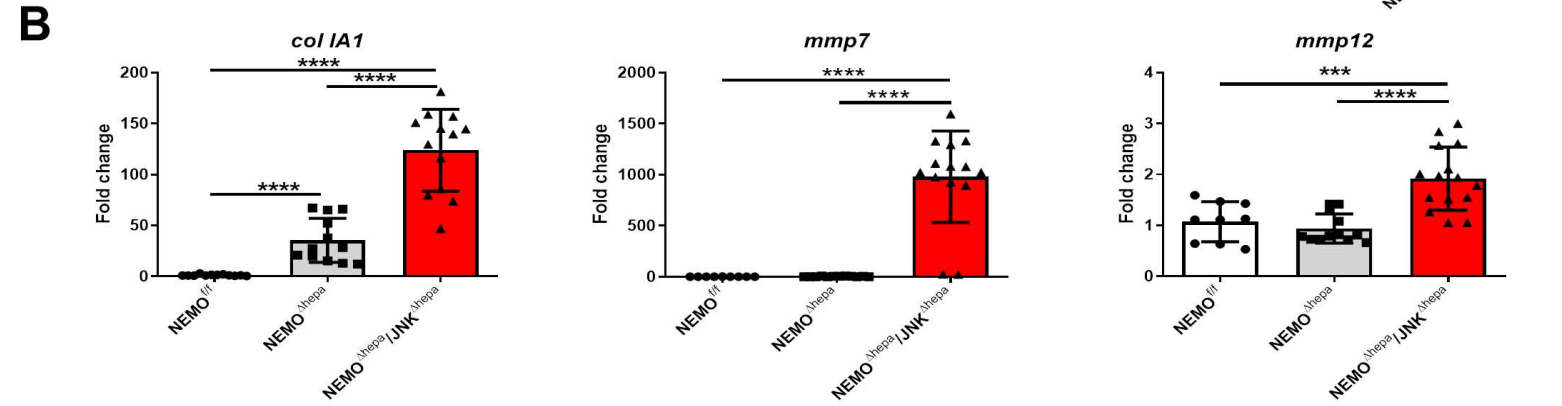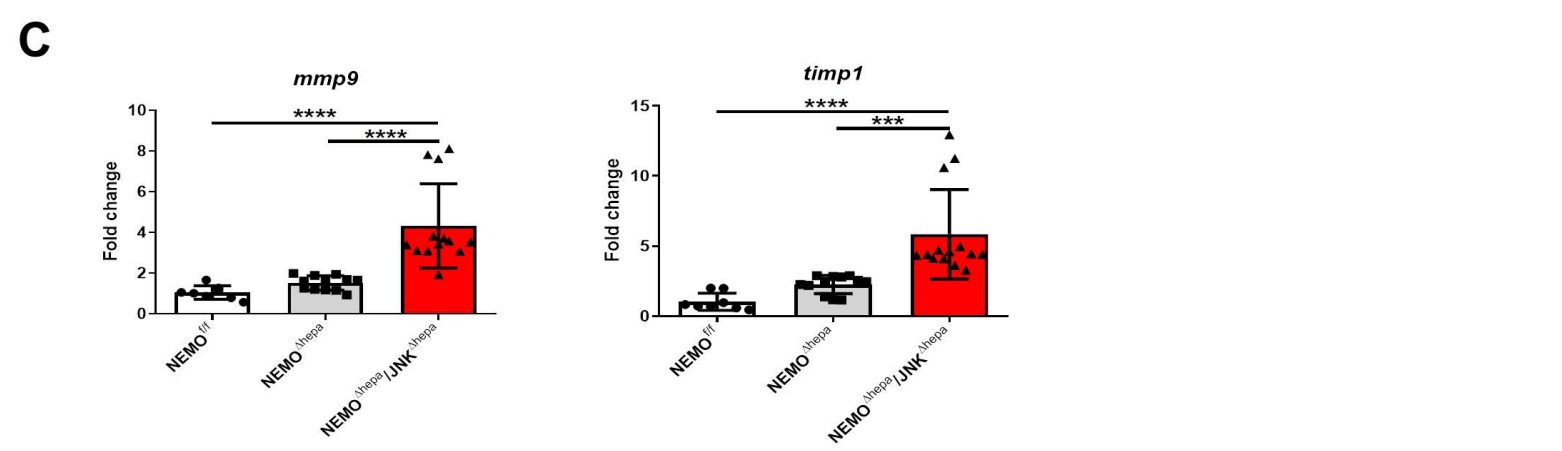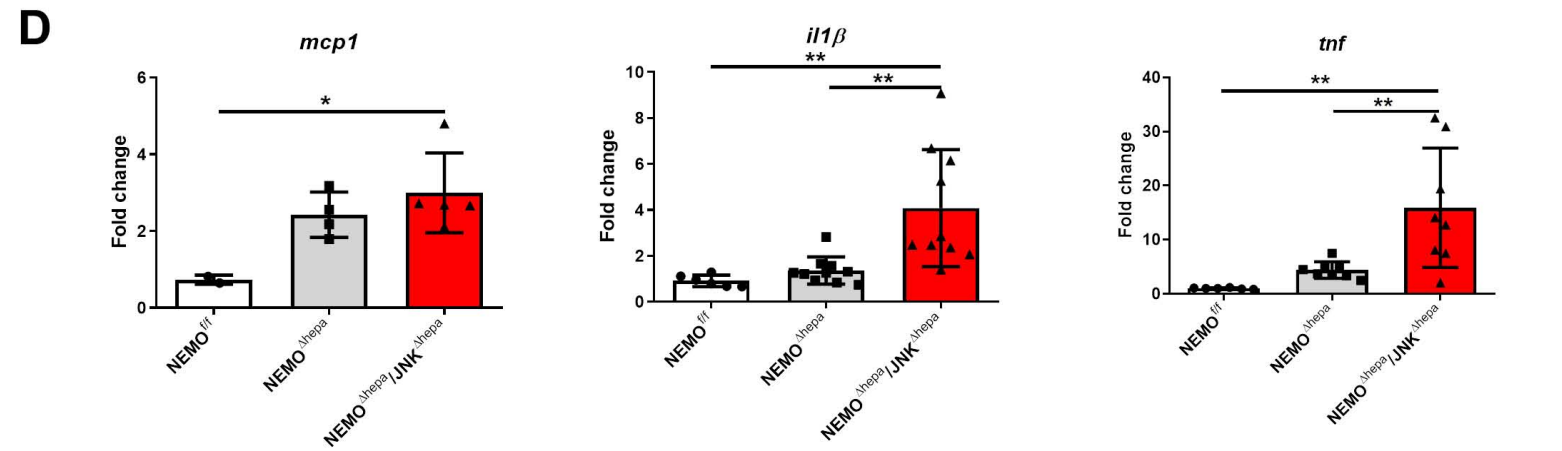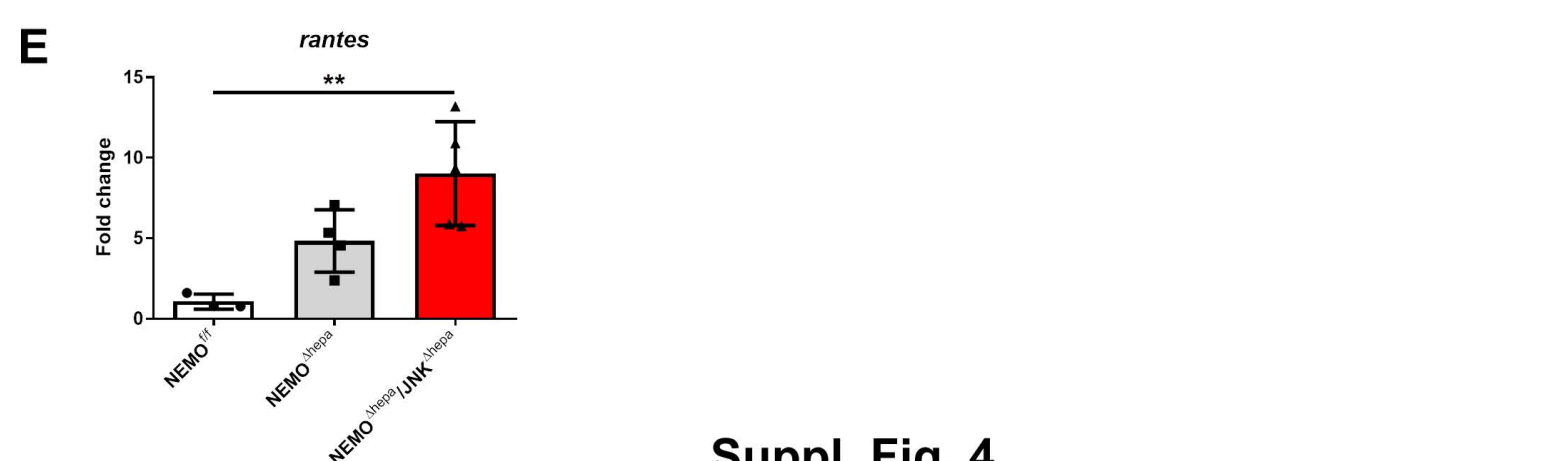

**Suppl. Fig. 4**

**A**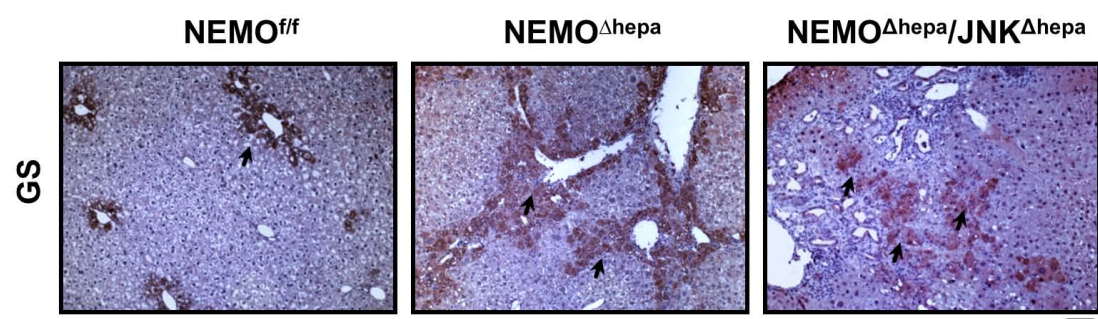**B**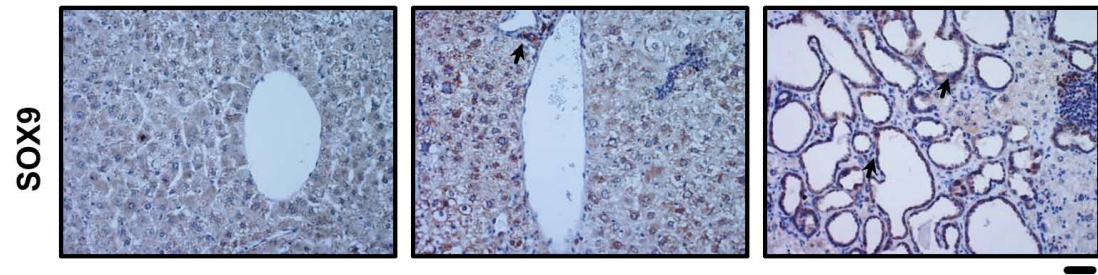

**A****NEMO<sup>fl/fl</sup>****JNK1<sup>Δhepa</sup>****JNK2<sup>-/-</sup>****JNK<sup>Δhepa</sup>****Liver**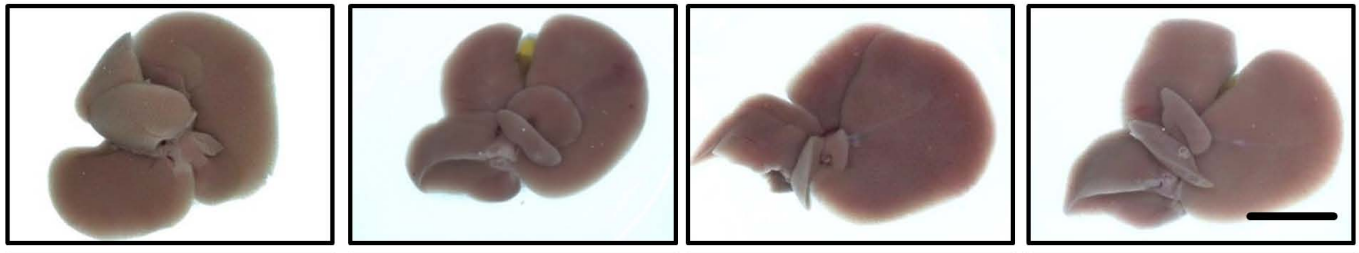**B****H&E**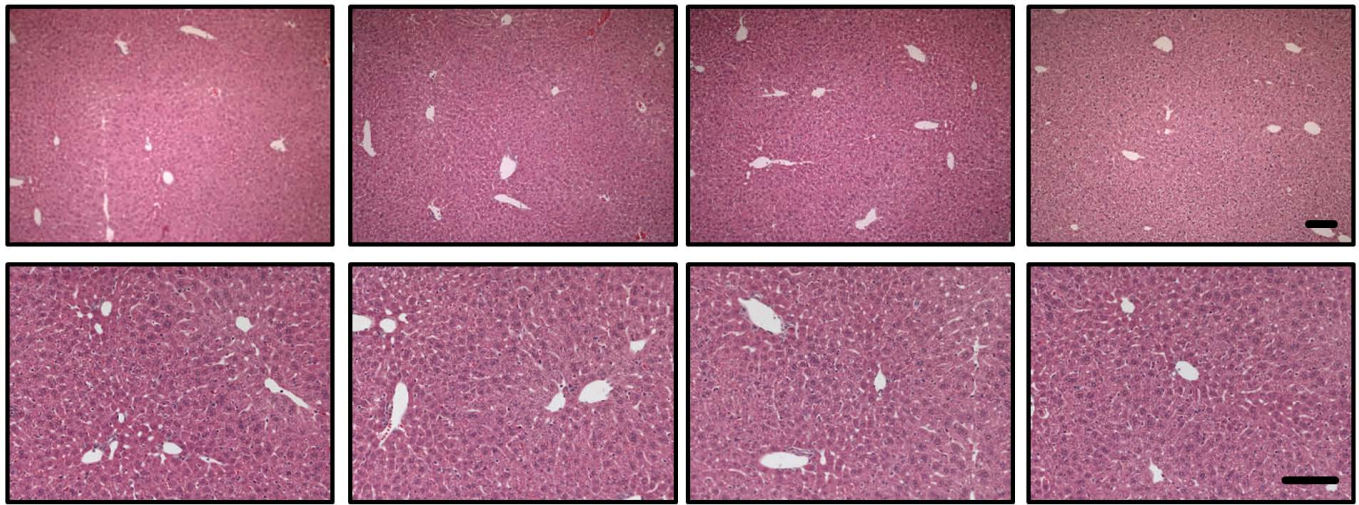**C**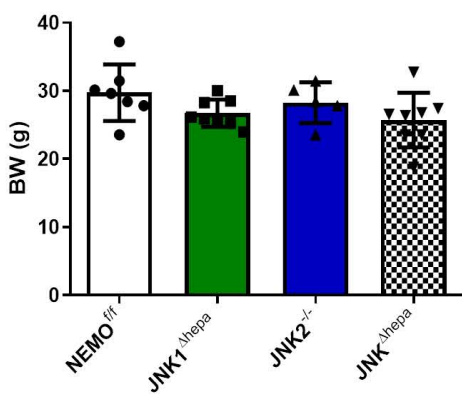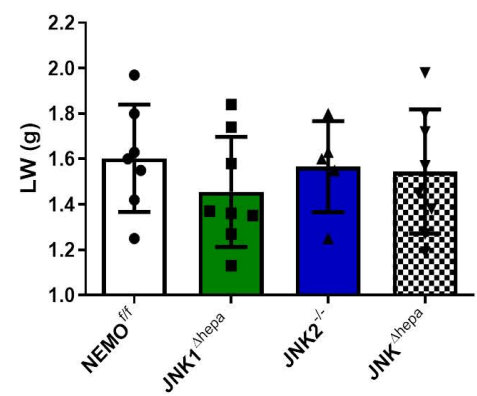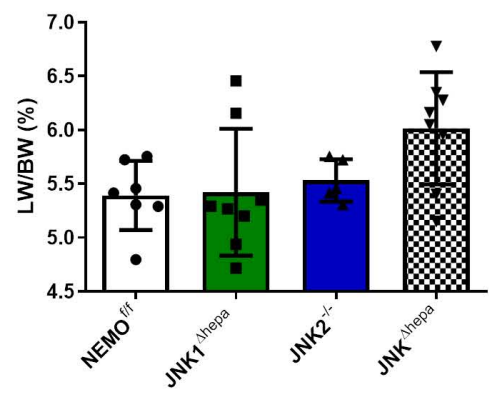**D**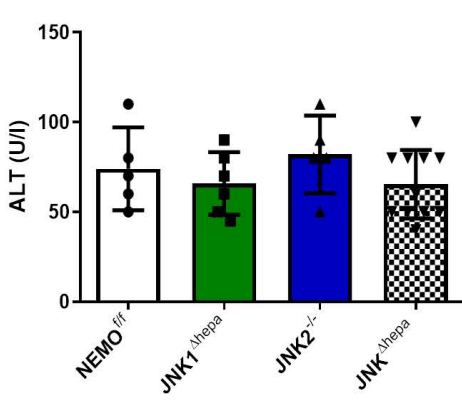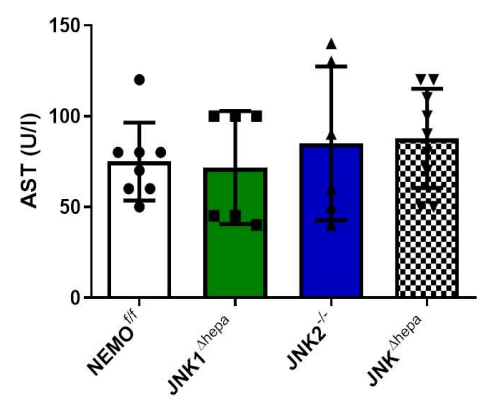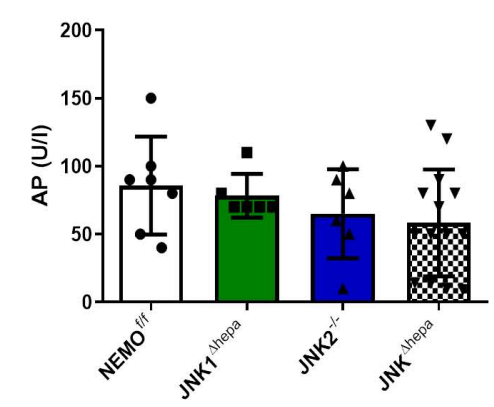**Suppl. Fig. 6**

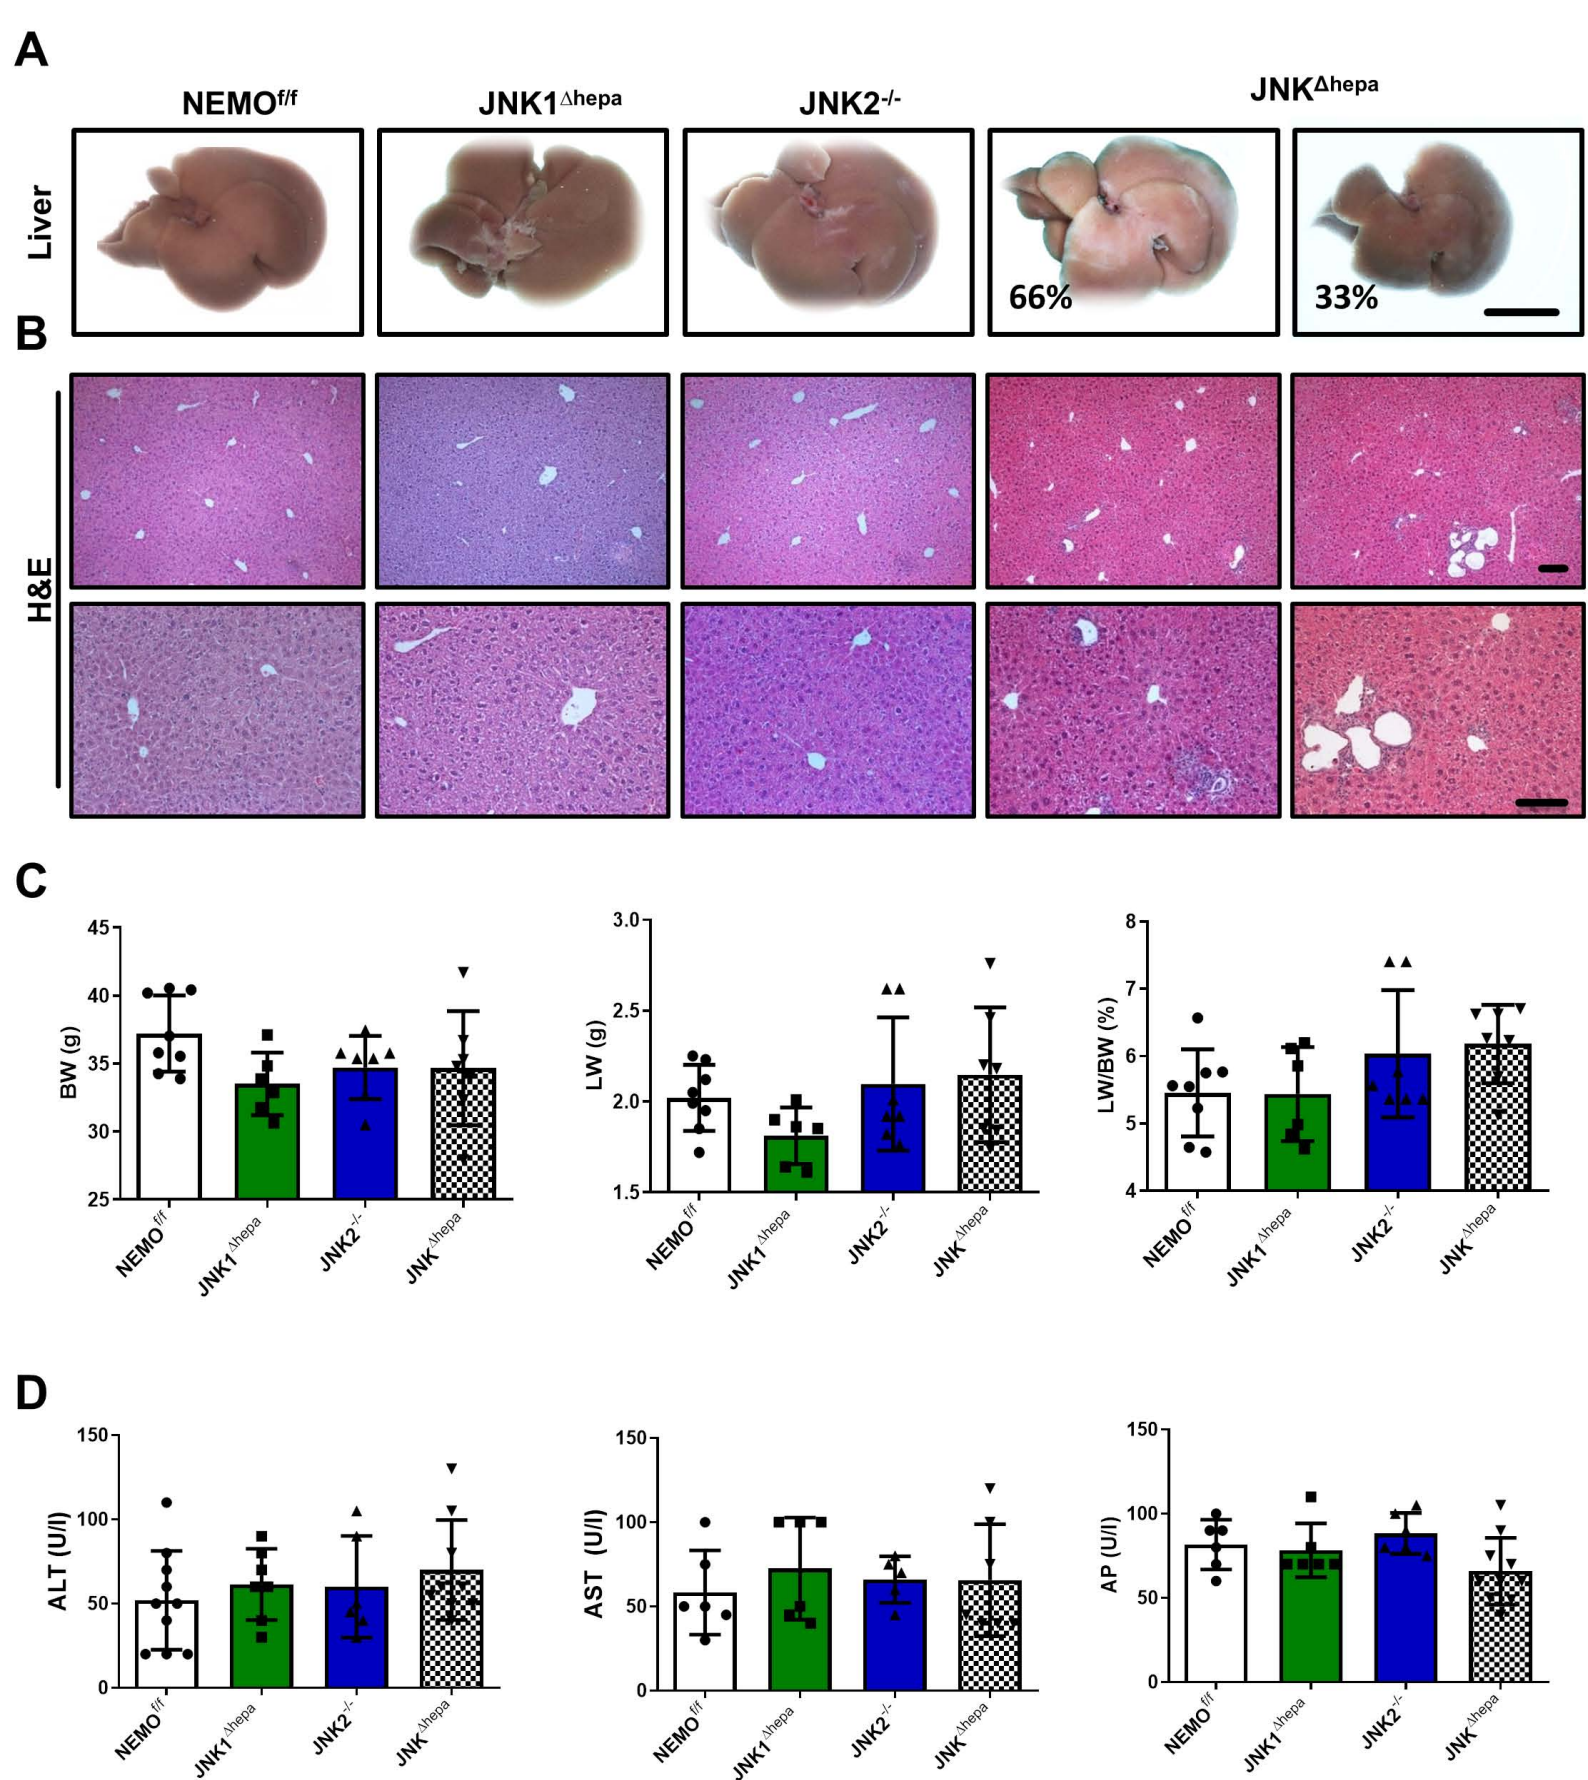

Suppl. Fig. 7

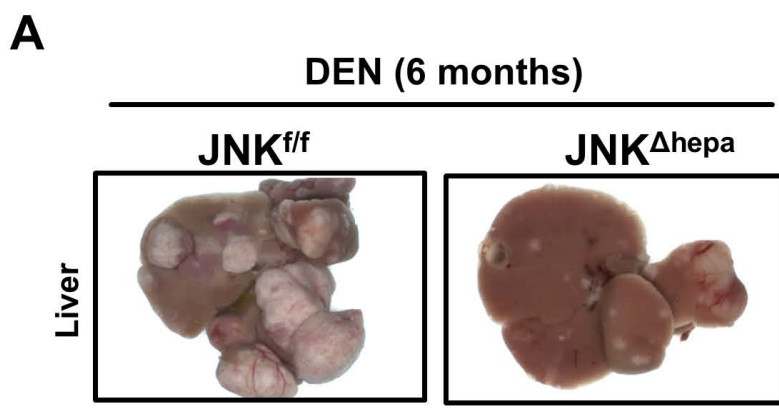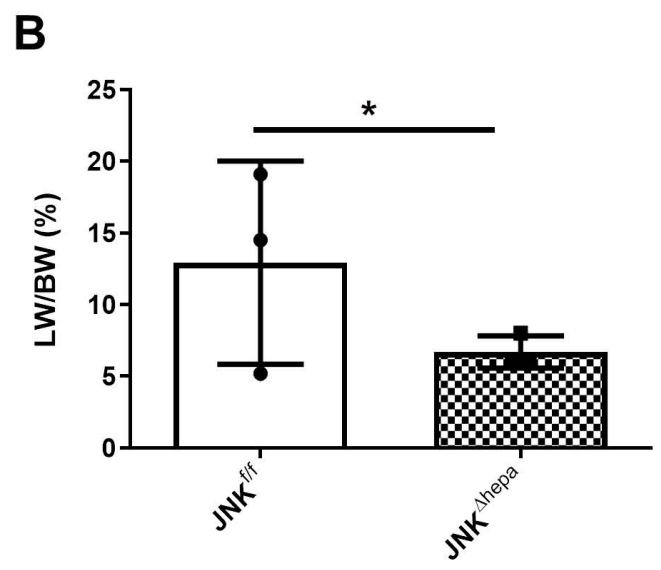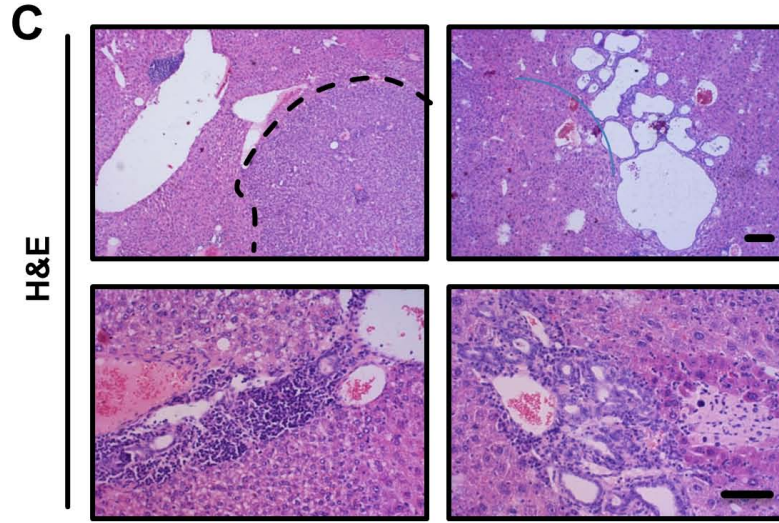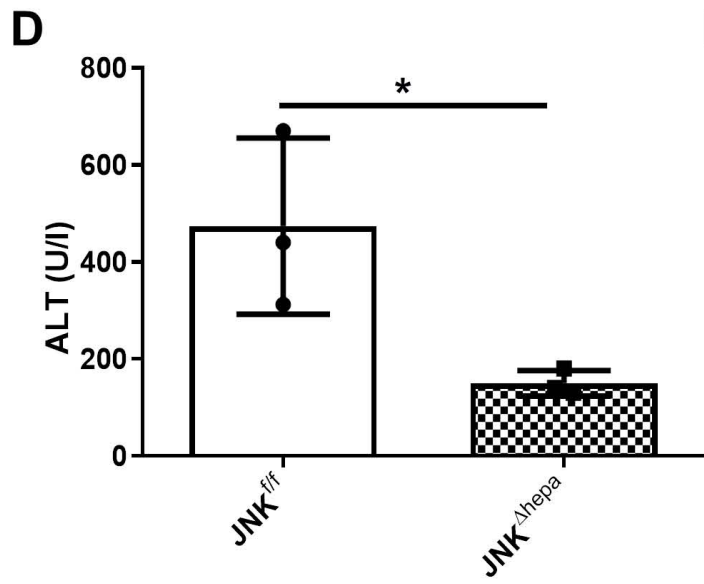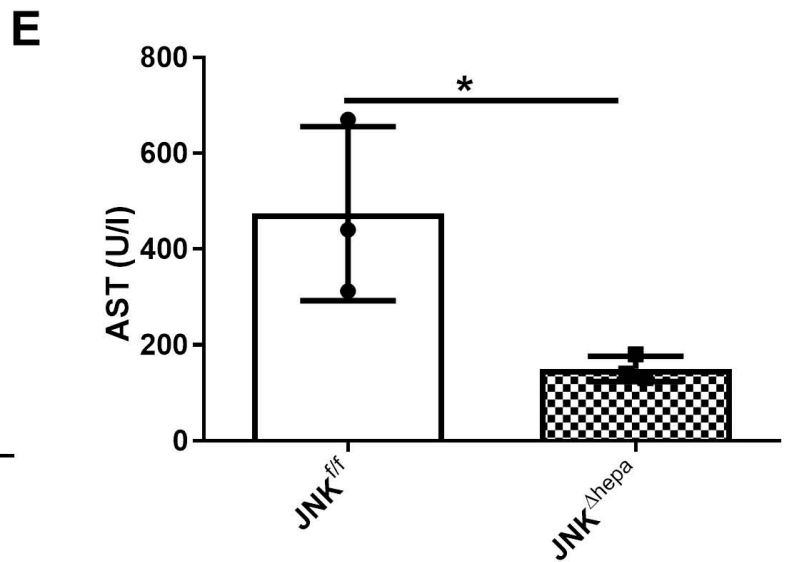



A

NEMO<sup>Δhepa</sup> /JNK<sup>ff</sup> vs NEMO<sup>Δhepa</sup> /JNK<sup>Δhepa</sup>

| Top canonical pathways                                                                                                                                                                             | Top upstream regulators                            | Top Molecules                                                                                                                                                |                                                                                                                                                               |
|----------------------------------------------------------------------------------------------------------------------------------------------------------------------------------------------------|----------------------------------------------------|--------------------------------------------------------------------------------------------------------------------------------------------------------------|---------------------------------------------------------------------------------------------------------------------------------------------------------------|
|                                                                                                                                                                                                    |                                                    | Up-regulated                                                                                                                                                 | Down-regulated                                                                                                                                                |
| IGF-1 signaling<br>CDK signaling<br>Liver hyperplasia/hyperproliferation<br>Liver regeneration<br>Carcinoma<br>Liver inflammation<br>CYP450<br>Nrf2-ROS<br>FFA metabolism<br>Xenobiotic metabolism | TCF7<br>Lipid metabolism<br>Tissue differentiation | <i>dmtb1</i><br><i>gabrp</i><br><i>mmp7</i><br><i>ighg1</i><br><i>cyp2s1</i><br><i>muc1</i><br><i>krt19</i><br><i>ighg2b</i><br><i>tff2</i><br><i>gpr128</i> | <i>mapk9</i><br><i>ugt1a1</i><br><i>myot</i><br><i>mogat1</i><br><i>sprr1a</i><br><i>ubd</i><br><i>spon2</i><br><i>aet1d/e</i><br><i>foh1</i><br><i>rragd</i> |

B

JNK<sup>ff</sup> vs JNK<sup>Δhepa</sup> + DEN

| Top canonical pathways                                                                                                                                          | Top upstream regulators            | Top Molecules                                                                                                                                     |                                                                                                                                                                       |
|-----------------------------------------------------------------------------------------------------------------------------------------------------------------|------------------------------------|---------------------------------------------------------------------------------------------------------------------------------------------------|-----------------------------------------------------------------------------------------------------------------------------------------------------------------------|
|                                                                                                                                                                 |                                    | Up-regulated                                                                                                                                      | Down-regulated                                                                                                                                                        |
| HSC activation<br>Liver fibrogenesis<br>B cell development<br>Th cell differentiation<br>Liver hyperplasia/hyperproliferation<br>Carcinoma<br>Liver cholestasis | LPS<br>IFN $\gamma$<br>IL-4<br>TNF | <i>gabrp</i><br><i>hsd3b4</i><br><i>hamp/hamp2</i><br><i>ccl17</i><br><i>xist</i><br><i>nfkb2</i><br><i>dmbt1</i><br><i>ighg2b</i><br><i>muc1</i> | <i>akr1c3</i><br><i>cpe</i><br><i>Comm3-bmi1</i><br><i>gldn</i><br><i>cacna1b</i><br><i>csn3</i><br><i>plin4</i><br><i>eif2s3y</i><br><i>ocstamp</i><br><i>tspan8</i> |

C

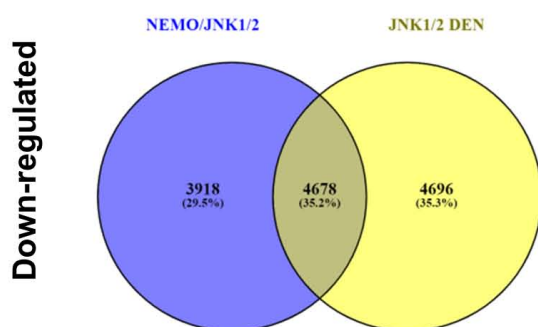

D

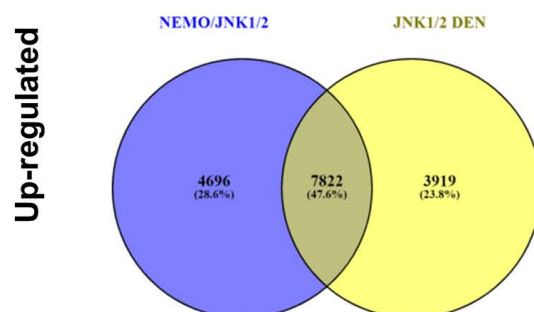

**A**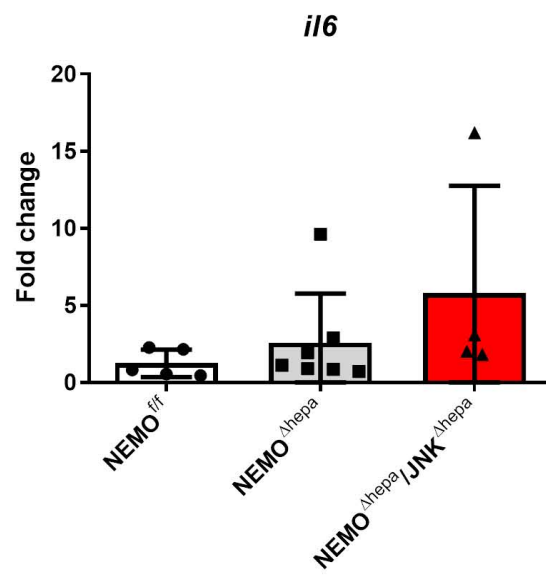**B**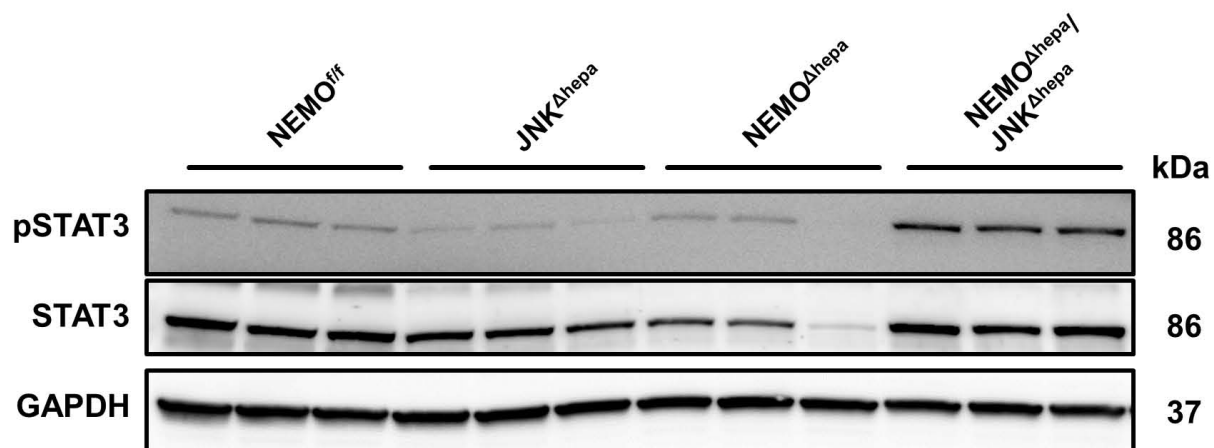

**A**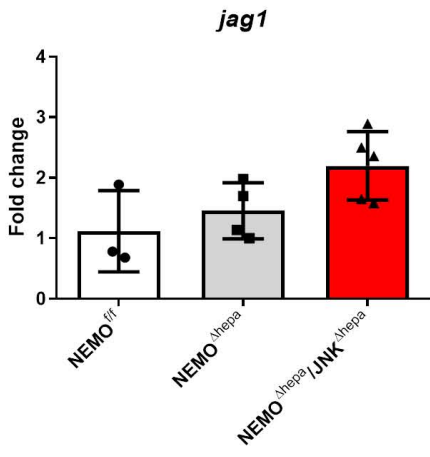**B**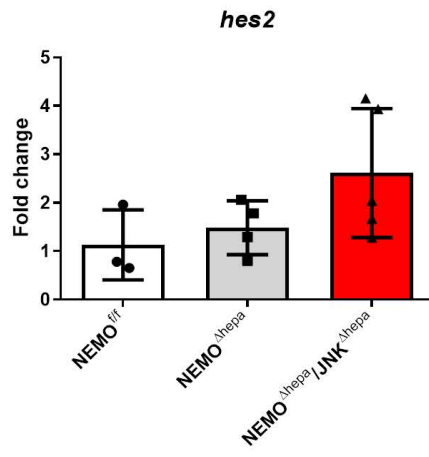**C**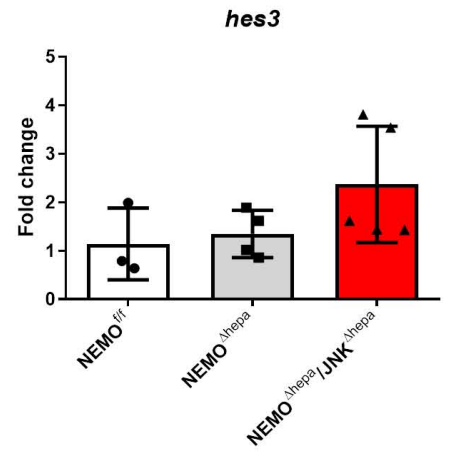**D**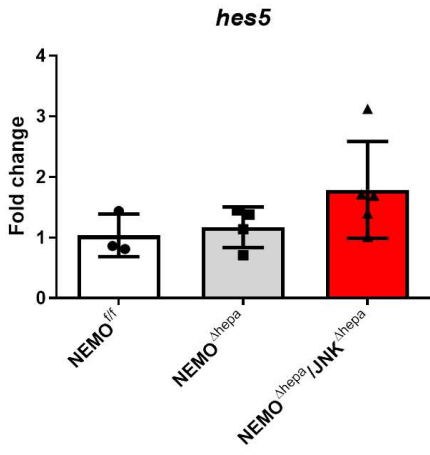**E**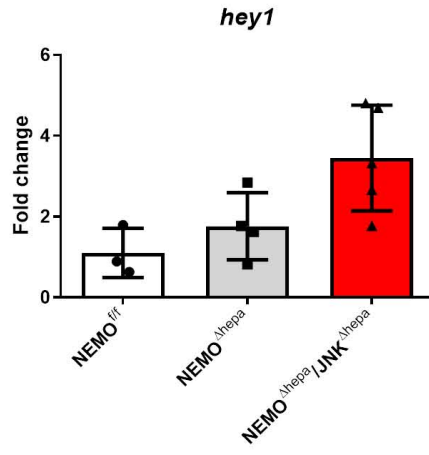**F**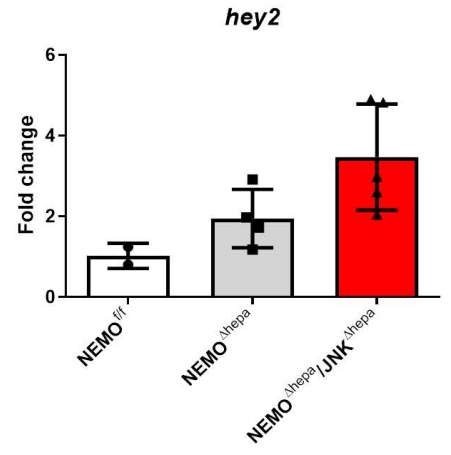

**A**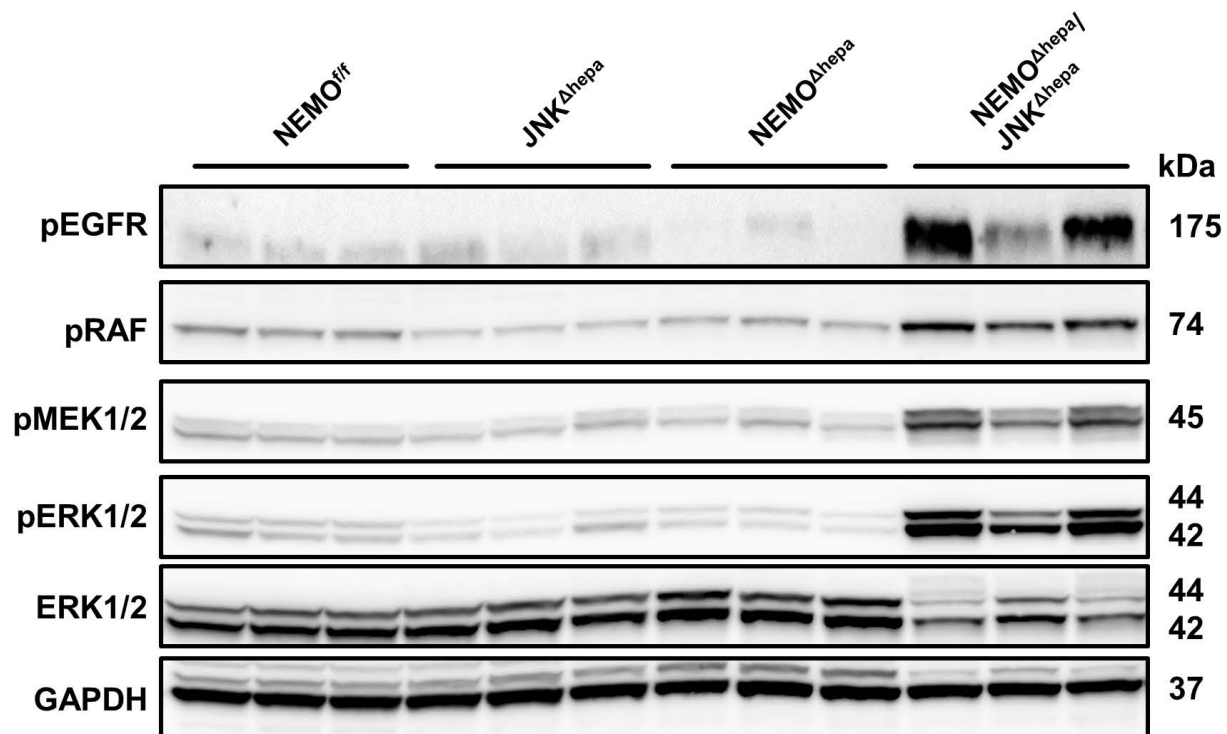

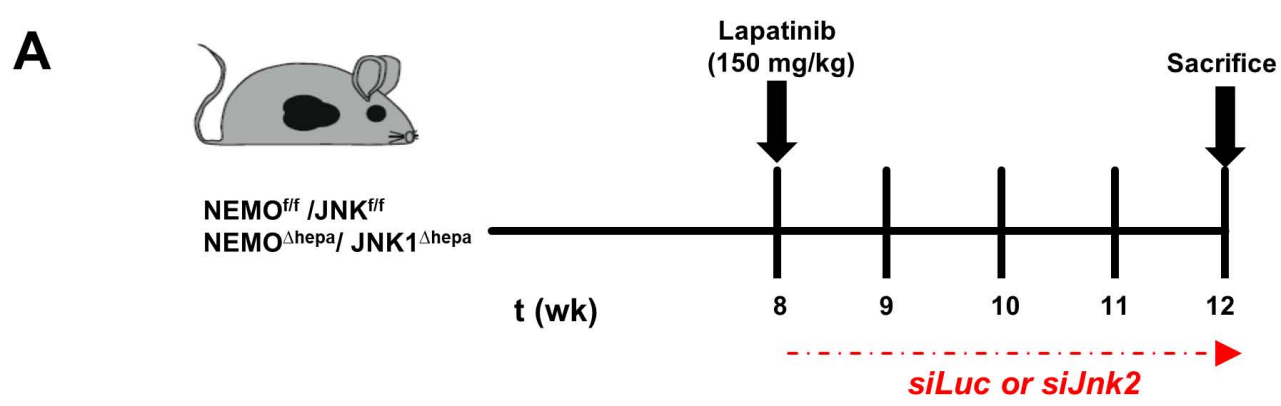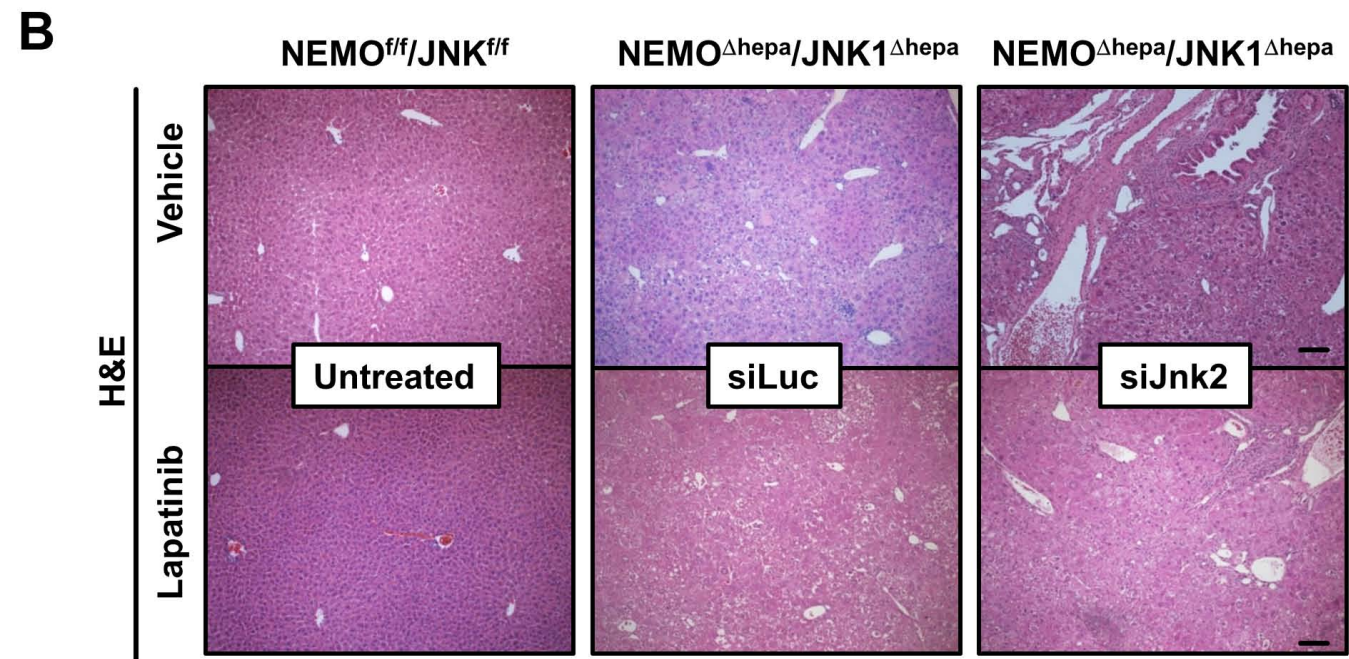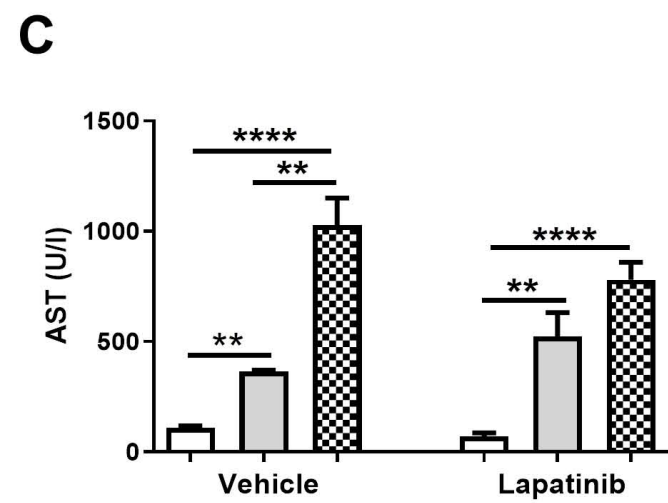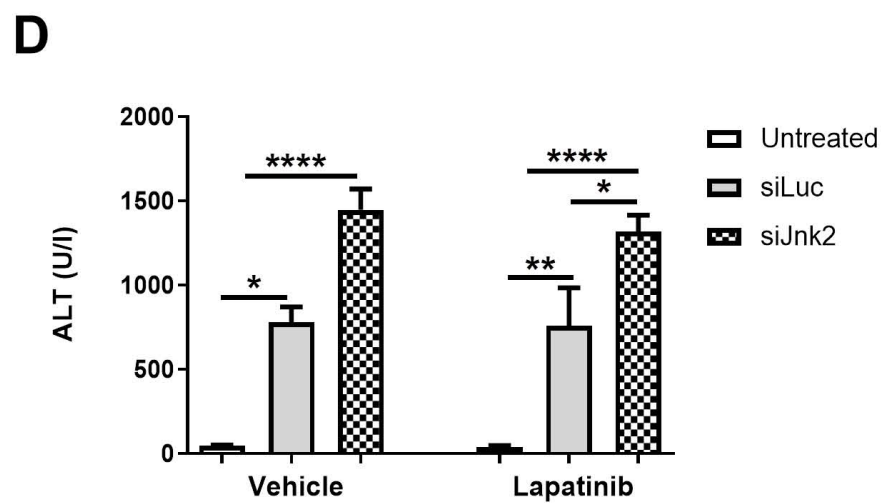

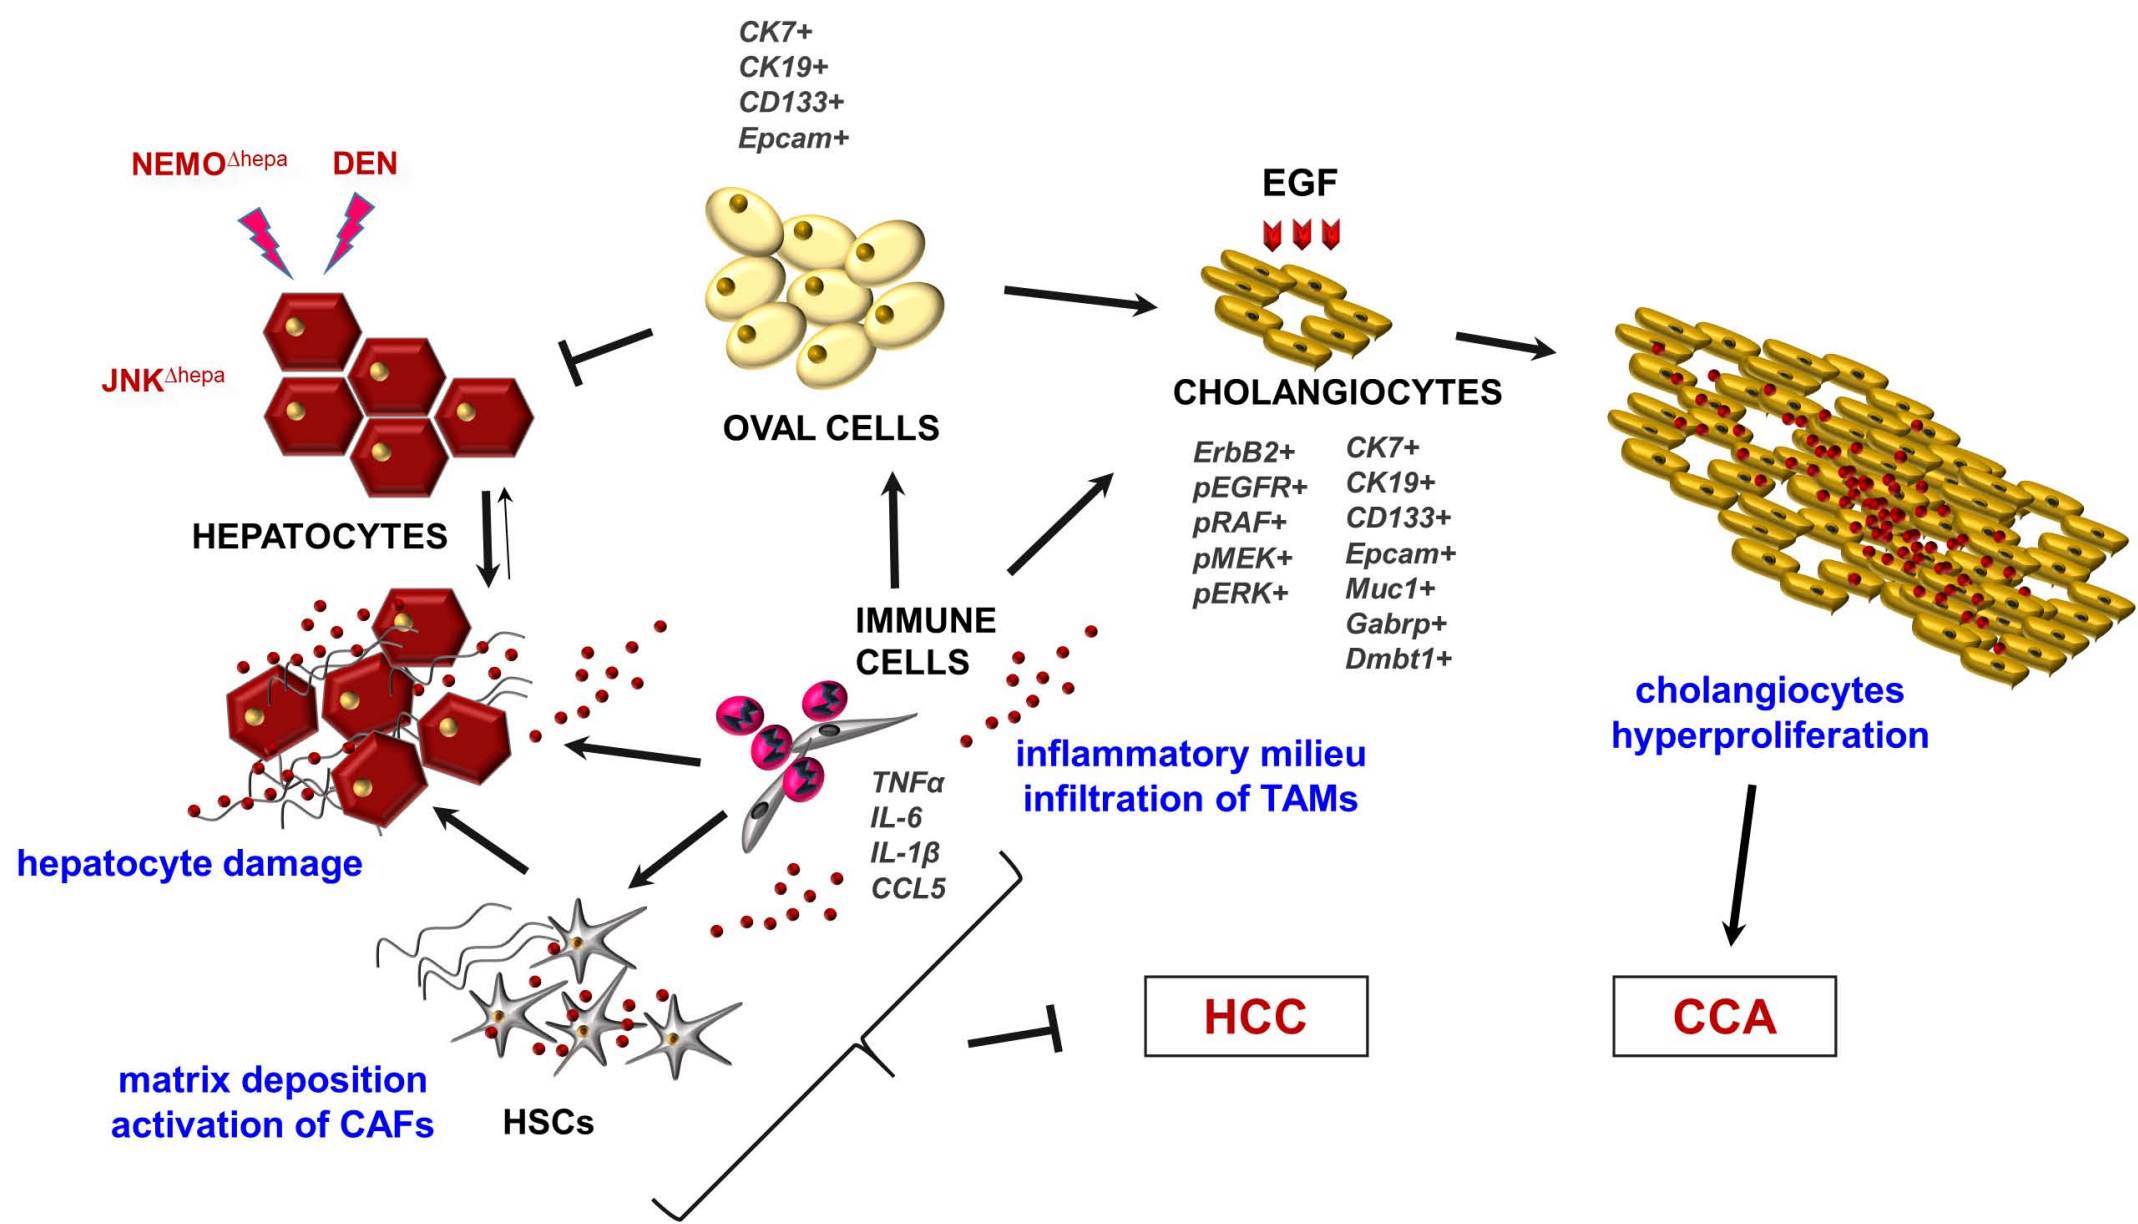

Suppl. Fig. 14
